# Supplementary material
Source: ML conference proceedings conference paper supplement (https://aclanthology.org/2020.emnlp-main.179)
Supplement: OptionalSupplementaryMaterial [file differences.pdf › camera_ready-supply/figs/differences.pdf]

Training

Testing

**Single-source CLT**

Lang 1

Lang 2

**Multi-source CLT**

Lang 1

...

Lang N

Lang N+1

**Multi-task Learning**

Lang 1

...

Lang N

Lang 1

...

Lang N

**L2CLT**

Lang group 1

Lang group N

Lang group N+1

Lang 1

...

Lang N

Lang N+1
