# Supplementary material
Source: ML conference proceedings conference paper supplement (https://aclanthology.org/2020.emnlp-main.179)

**Goal:**  $\{EN, FR, DE\} \rightarrow JA$

## Meta train

Task1:  $\{EN, FR\} \rightarrow DE$

Task2:  $\{EN, DE\} \rightarrow FR$

Task3:  $\{FR, DE\} \rightarrow EN$

...

## Meta test

Test task:  $\{EN, FR, DE\} \rightarrow JA$

MGL

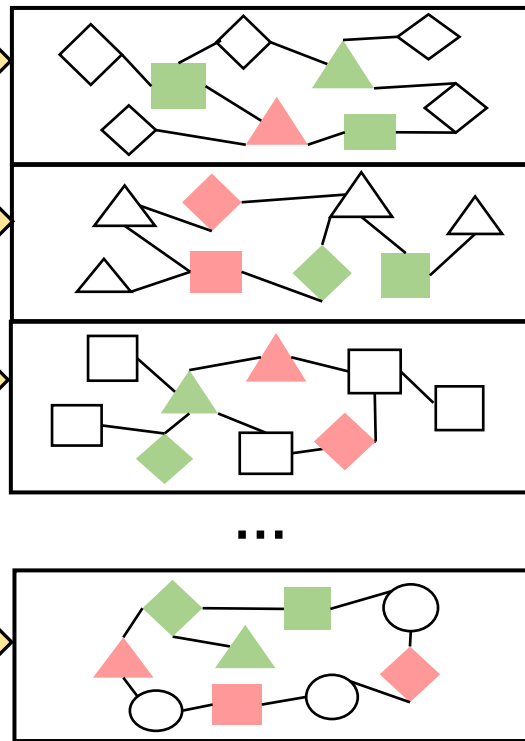

EN FR DE JA

language

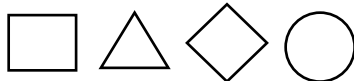

class

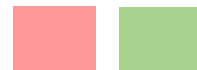

Supplement: OptionalSupplementaryMaterial [file example.pdf › camera_ready-supply/figs/example.pdf]
