# Supplementary material
Source: ML conference proceedings conference paper supplement (https://aclanthology.org/2020.emnlp-main.179)
Supplement: OptionalSupplementaryMaterial [file supply.pdf › camera_ready-supply/supply.pdf]

## A Meta Graph Learning Algorithm

We demonstrate the Meta Graph Learning (MGL) method in Algorithm 1. The whole process consists of three stages: (1) Meta-train on the source languages; (2) Meta-test on the target language; (3) Evaluate on the target language.

## B Experimental Environment

Our MGL model and baseline methods are all using Tensorflow 2.0.0 based on CUDA 10.0, single V100 GPU, and are tested on Linux, Python 3.7.4 from Anaconda 4.7.12.

## C Baselines

We provide the available open source code for the baseline methods we compare with, including: CL-SCL<sup>1</sup> (Prettenhofer and Stein, 2010); MUSE<sup>2</sup> (Conneau et al., 2018) BWE; MAN-MoE (Chen et al., 2019)<sup>3</sup>; Reptile<sup>4</sup> (Nichol et al., 2018). For other methods, we ask for the source code from authors or directly report the results in their original paper.

## D Multilingual Search Relevance Dataset

For detail, we provide the statistics of the large-scale industrial multilingual search relevance dataset (Ahuja et al., 2020) in Table 1.

## E Hyper-parameter Sensitivity

The proposed MGL method involves several hyper-parameters. Here, we evaluate how different choices of hyper-parameters affect the performance of MGL. In the following, except for the parameter being tested, all other parameters keep the same. Hyper-parameter sensitivity is done in the multilingual Amazon review dataset.

### E.1 The number of neighborhoods

We investigate the influence of the number of the neighborhood in the  $K$ -nearest meta graph for the proposed MGL model. We use the averaged accuracy among all 9 cross-lingual transfer experiments on the multilingual Amazon review dataset and test the performance with  $K = 1, 5, 10, 15, 20$ . The

<sup>1</sup><https://github.com/pprett/nut>

<sup>2</sup><https://github.com/facebookresearch/muse>

<sup>3</sup><https://github.com/microsoft/Multilingual-Model-Transfer>

<sup>4</sup><https://github.com/openai/supervised-reptile>

results are shown in Figure 1. Increasing  $K$  from 1, 5 to 10 shows continuous improvements. When  $K$  further increases, the performance stops to improve and tends to be stable. This demonstrates that increasing the number of the neighborhoods in an appropriate interval, i.e.,  $[1, 10]$ , is beneficial for transferring more useful knowledge to improve the learning in the low-resource target language. While further incorporating more neighborhoods cannot enhance the transfer effectiveness since it may bring in some useless heterogeneous information for propagation.

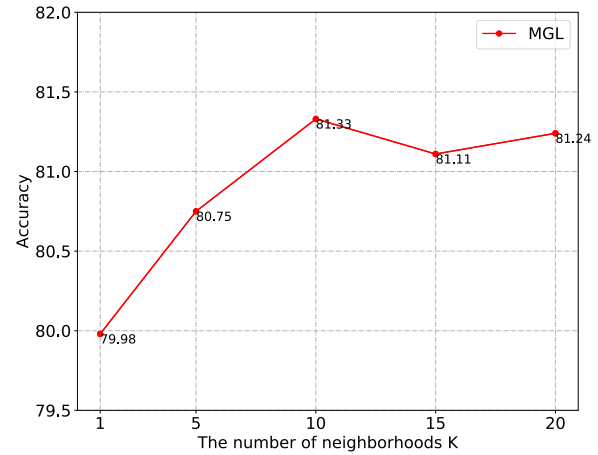

Figure 1: The results w.r.t. the different number of the neighborhoods  $K$  on the Amazon review dataset.

## References

- Aman Ahuja, Nikhil Rao, Sumeet Katariya, Karthik Subbian, and Chandan K Reddy. 2020. Language-agnostic representation learning for product search on e-commerce platforms. In *WSDM*, pages 7–15.
- Xilun Chen, Ahmed Hassan, Hany Hassan, Wei Wang, and Claire Cardie. 2019. Multi-source cross-lingual model transfer: Learning what to share. In *ACL*, pages 3098–3112.
- Alexis Conneau, Guillaume Lample, Marc’Aurelio Ranzato, Ludovic Denoyer, and Hervé Jégou. 2018. Word translation without parallel data. In *ICLR*.
- Diederik P Kingma and Jimmy Ba. 2014. Adam: A method for stochastic optimization. *arXiv preprint arXiv:1412.6980*.
- Alex Nichol, Joshua Achiam, and John Schulman. 2018. On first-order meta-learning algorithms. *arXiv preprint arXiv:1803.02999*.
- Peter Prettenhofer and Benno Stein. 2010. Cross-language text classification using structural correspondence learning. In *ACL*, pages 1118–1127.

| Language     | Domain | # Train pairs (+   -)      | # Val pairs (+   -)     | # Test pairs (+   -)    |
|--------------|--------|----------------------------|-------------------------|-------------------------|
| French (FR)  | Search | 38,069 (33,499   4,570)    | 4,230 (3,768   462)     | 20,796 (17,930   2,866) |
| Spanish (ES) | Search | 53,330 (45,717   7,583)    | 5,923 (5,096   827)     | 23,395 (19,973   3,422) |
| Italian (IT) | Search | 106,563 (82,059   24,504)  | 9,088 (9,115   2,753)   | 46,309 (38,908   7,401) |
| English (EN) | Search | 282,046 (26,0879   21,167) | 31,339 (28,980   2,359) | 48,504 (45,638   2,866) |
| German (DE)  | Search | 258,522 (241,192   17,330) | 28,725 (26,798   1,927) | 64,391 (58,952   5,439) |

Table 1: The statistics for the multilingual search relevance dataset.

**Algorithm 1: Meta Graph Learning (MGL)**


---

**Input:** Source languages  $\{\ell_i^s\}_{i=1}^T$ , Target language  $\ell^t$ ;  
**Input:** Hyperparameter: learning rate,  $N$ ,  $T$ ,  $K$ ,  $dim_0$ ,  $dim_1$ ,  $\#train\_episodes$ ,  $\#test\_episodes$ ,  $\#eval\_times$   
**Output:** Performances of the target language

- 1 Initialize  $f_\theta$  with the mPLM, e.g., mBERT;
- 2 Randomly initialize  $\Theta = \{\mathbf{W}^{(0)}, \mathbf{W}^{(1)}, \mathbf{W}_\sigma, \mathbf{b}_\sigma\}$ ;
- 3 Generate source language pairs  $\{p_o^s\}_{o=1}^T$  by *leave-one-out* and the target pair  $p^t$ ;  
 /\* Meta-train on the source languages \*/
- 4 **while not done do**
  - 5   **for**  $i=1, 2, \dots, \#train\_episodes$  **do**
    - 6     **for each pair**  $p_o^s$  **in**  $\{p_o^s\}_{o=1}^T$  **do**
      - 7       Sample a support set  $\mathcal{S}$  and a query set  $\mathcal{Q}$  from  $p_o^s$ ;
      - 8       Feed  $\mathcal{S}$  and  $\mathcal{Q}$  into the mPLM encoder  $f_\theta$  and get the node embedding matrix  $\mathbf{H}$ ;
      - 9       Compute instance-wise length scale parameter  $\sigma_j$  by Eq. (1);
      - 10       Compute adjacency matrix  $\mathbf{A}$  by Eq. (2) and construct a  $K$ -nearest meta graph;
      - 11       Normalize  $\mathbf{A}$  and Compute  $\mathbf{z}$  by Eq. (4-5);
      - 12       Evaluate  $\mathcal{J}$  by Eq. (6);
      - 13       Update  $f_\theta$  and  $\Theta$  by gradient descent;
    - 14     **end**
  - 15   **end**
- 16 **end**  
 /\* Meta-test on the target language \*/
- 17 **while not done do**
  - 18   **for**  $i=1, 2, \dots, \#test\_episodes$  **do**
    - 19     Sample a support set  $\mathcal{S}$  and a query set  $\mathcal{Q}$  from  $p^t$ ;
    - 20     **Repeat** line 8-13;
  - 21   **end**
- 22 **end**  
 /\* Evaluating on the target language \*/
- 23 **for**  $i = 1, 2, \dots, \#eval\_times$  **do**
  - 24   Randomly sample a support set  $\mathcal{S}$  from  $p^t$ ;
  - 25   **while not done do**
    - 26     Sample  $\mathcal{Q}$  from the testing data of  $\ell^t$  and predict;
  - 27   **end**
- 28 **end**
- 29 **Return** Averaged results over  $\#eval\_times$ ;

---
