# Supplementary material
Source: ML conference proceedings conference paper supplement (https://aclanthology.org/2020.emnlp-main.179)

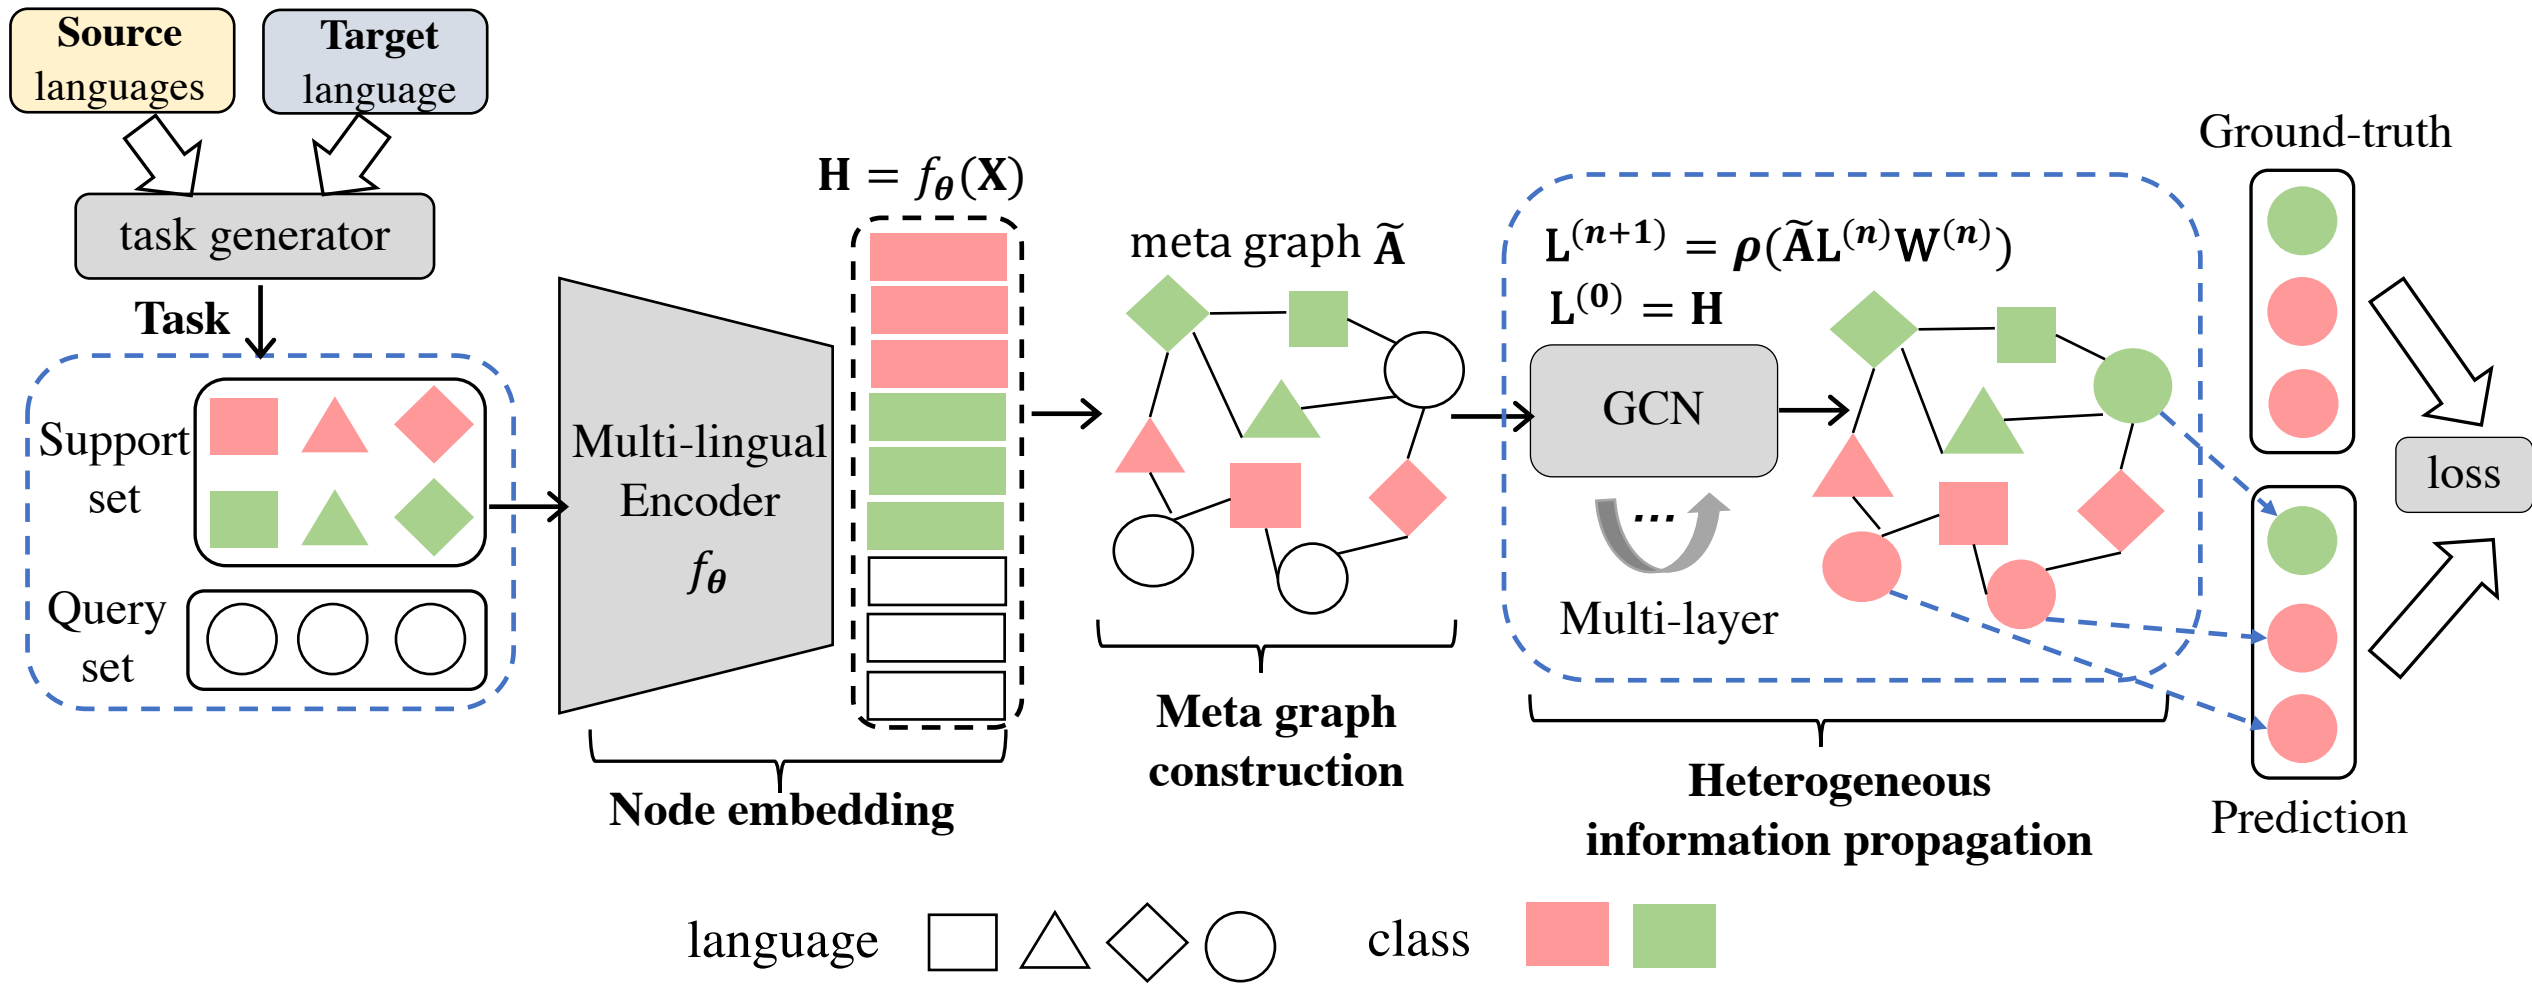

Supplement: OptionalSupplementaryMaterial [file architecture.pdf › camera_ready-supply/figs/architecture.pdf]

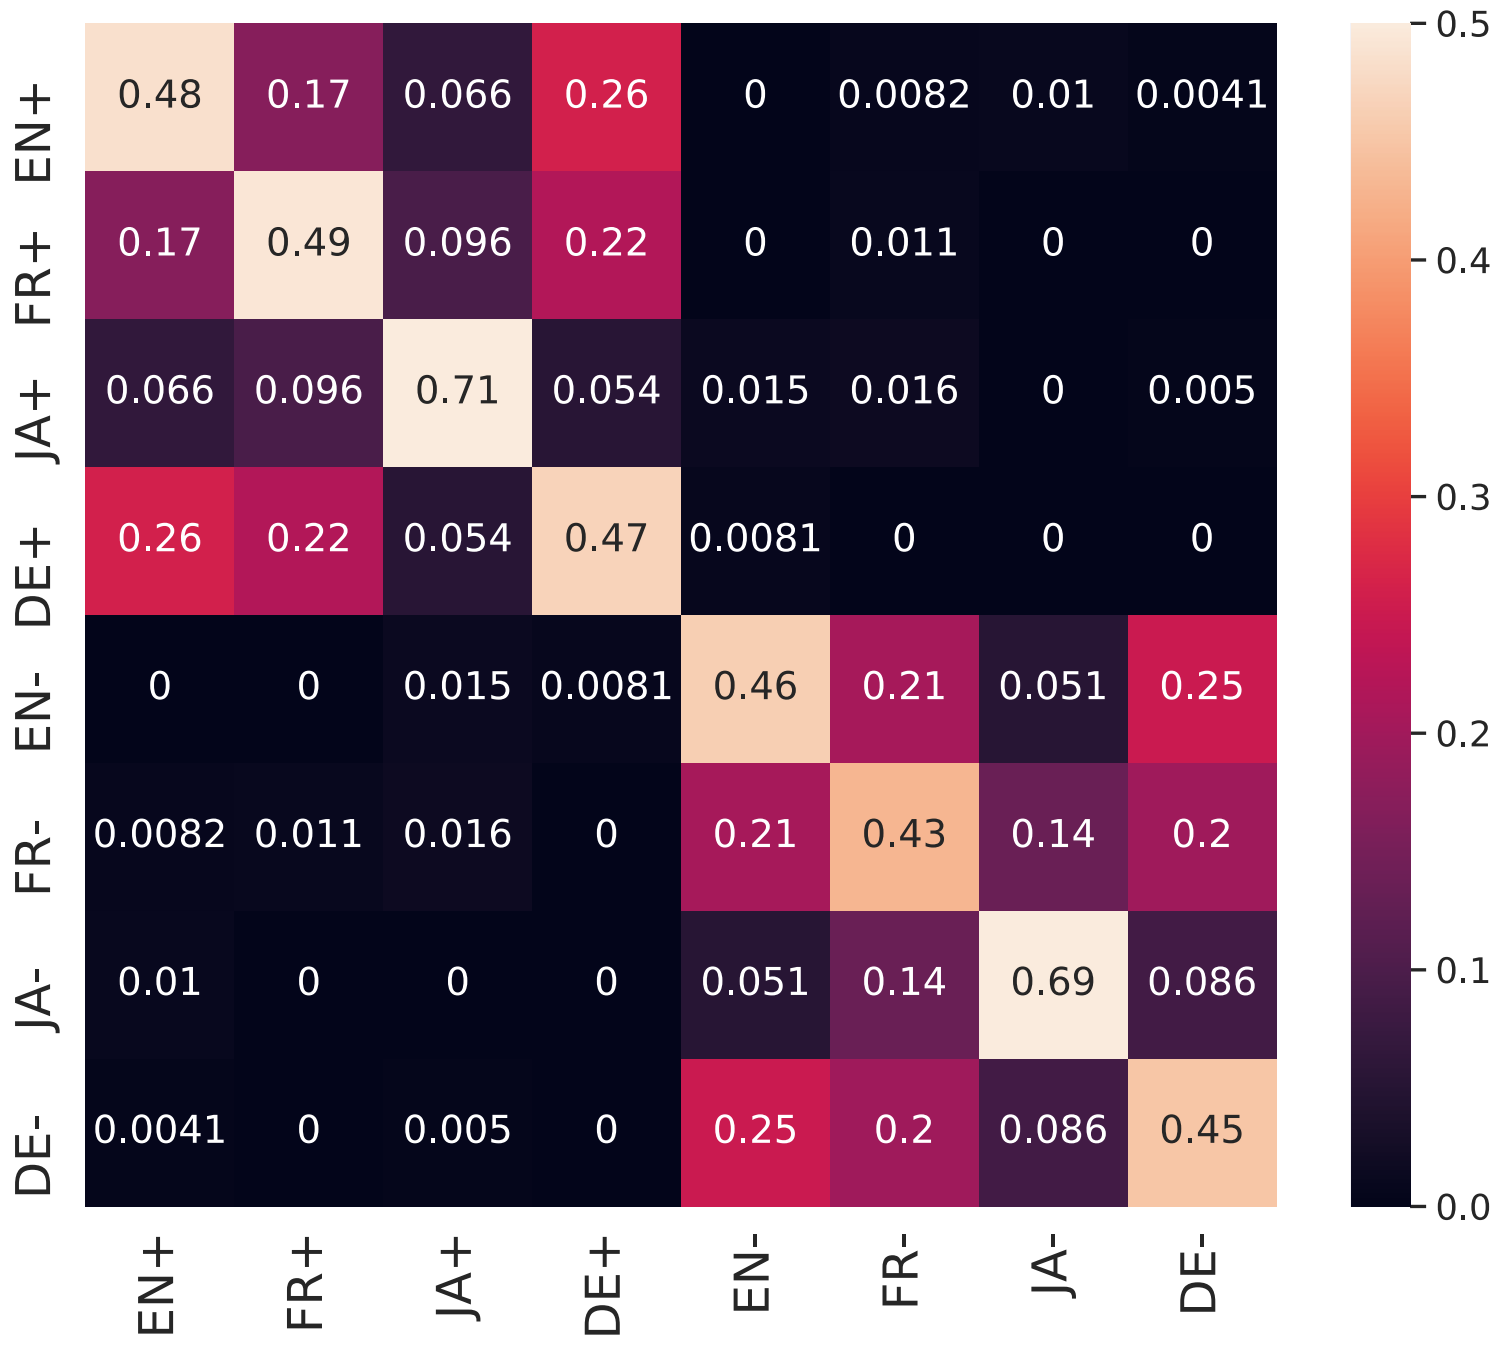

Supplement: OptionalSupplementaryMaterial [file lang2lang-de-music-K=2.pdf › camera_ready-supply/figs/deep_number/lang2lang-de-music-K=2.pdf]

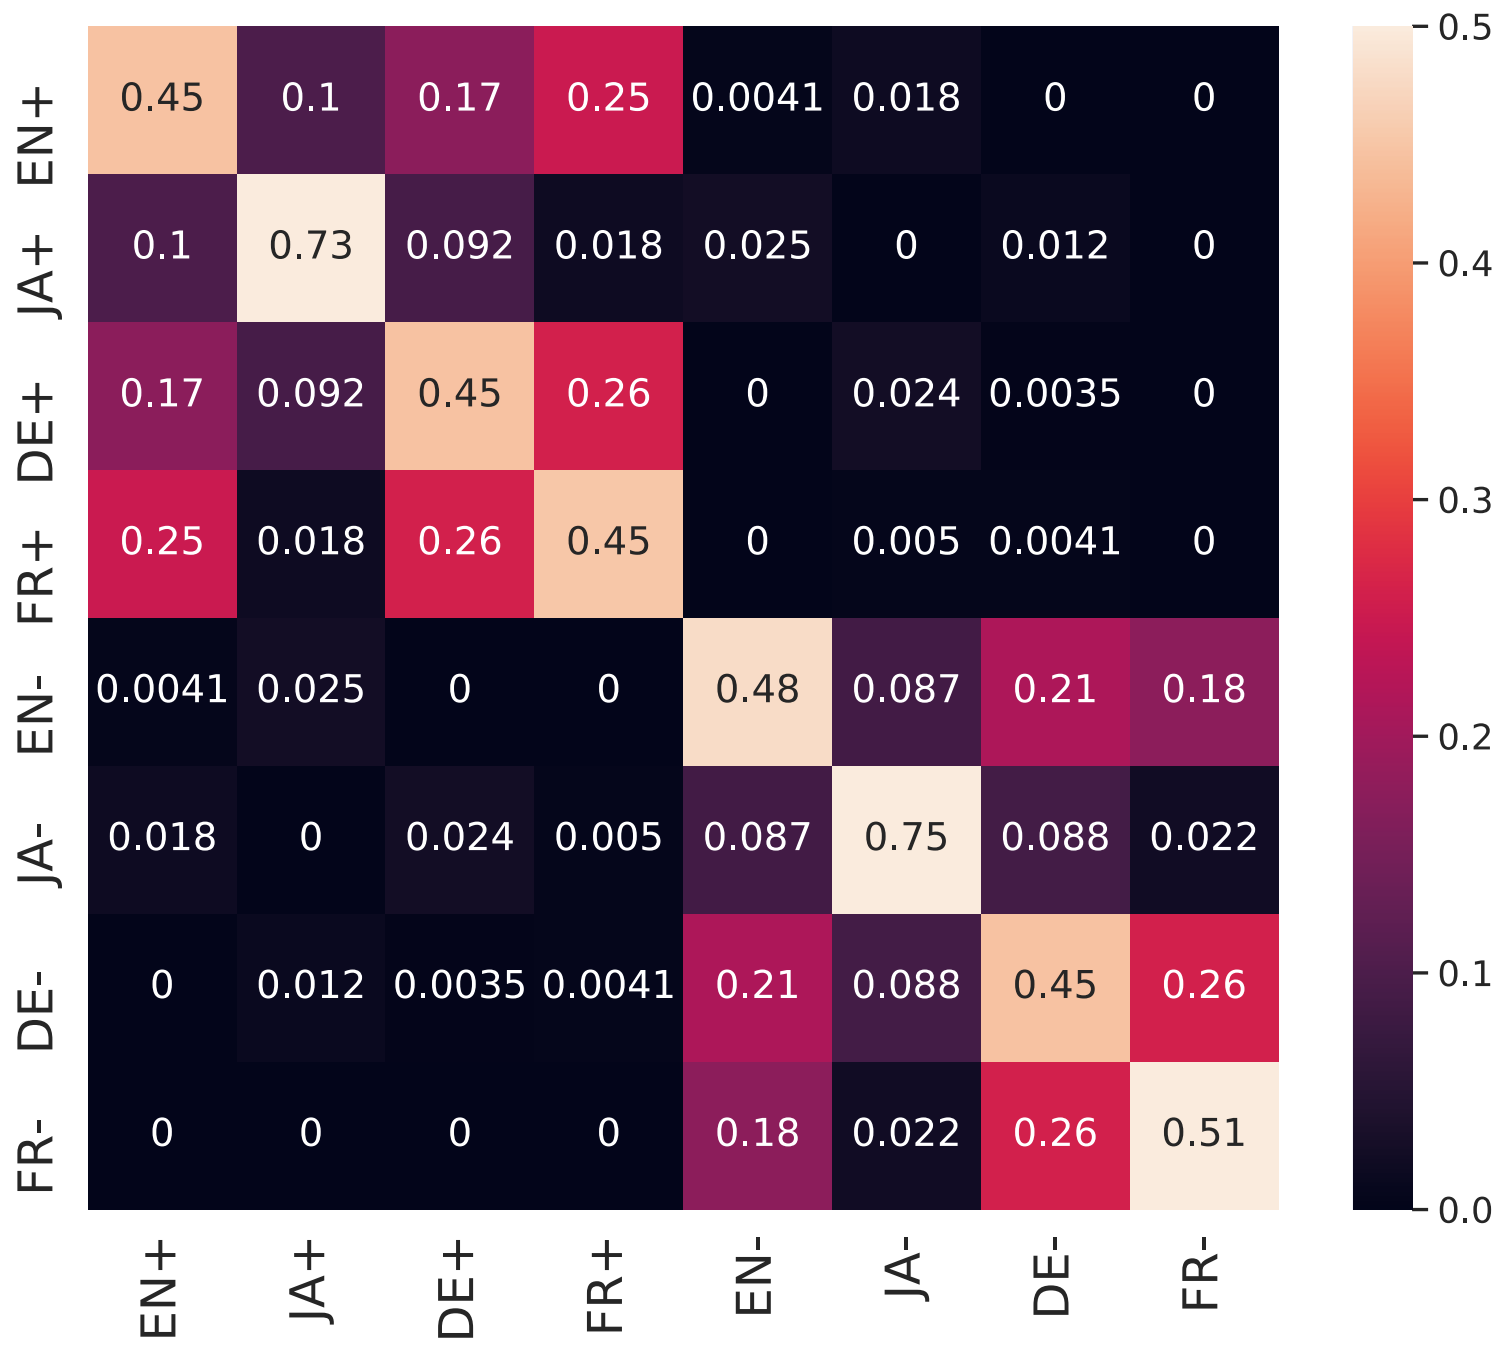

Supplement: OptionalSupplementaryMaterial [file lang2lang-fr-music-K=2.pdf › camera_ready-supply/figs/deep_number/lang2lang-fr-music-K=2.pdf]

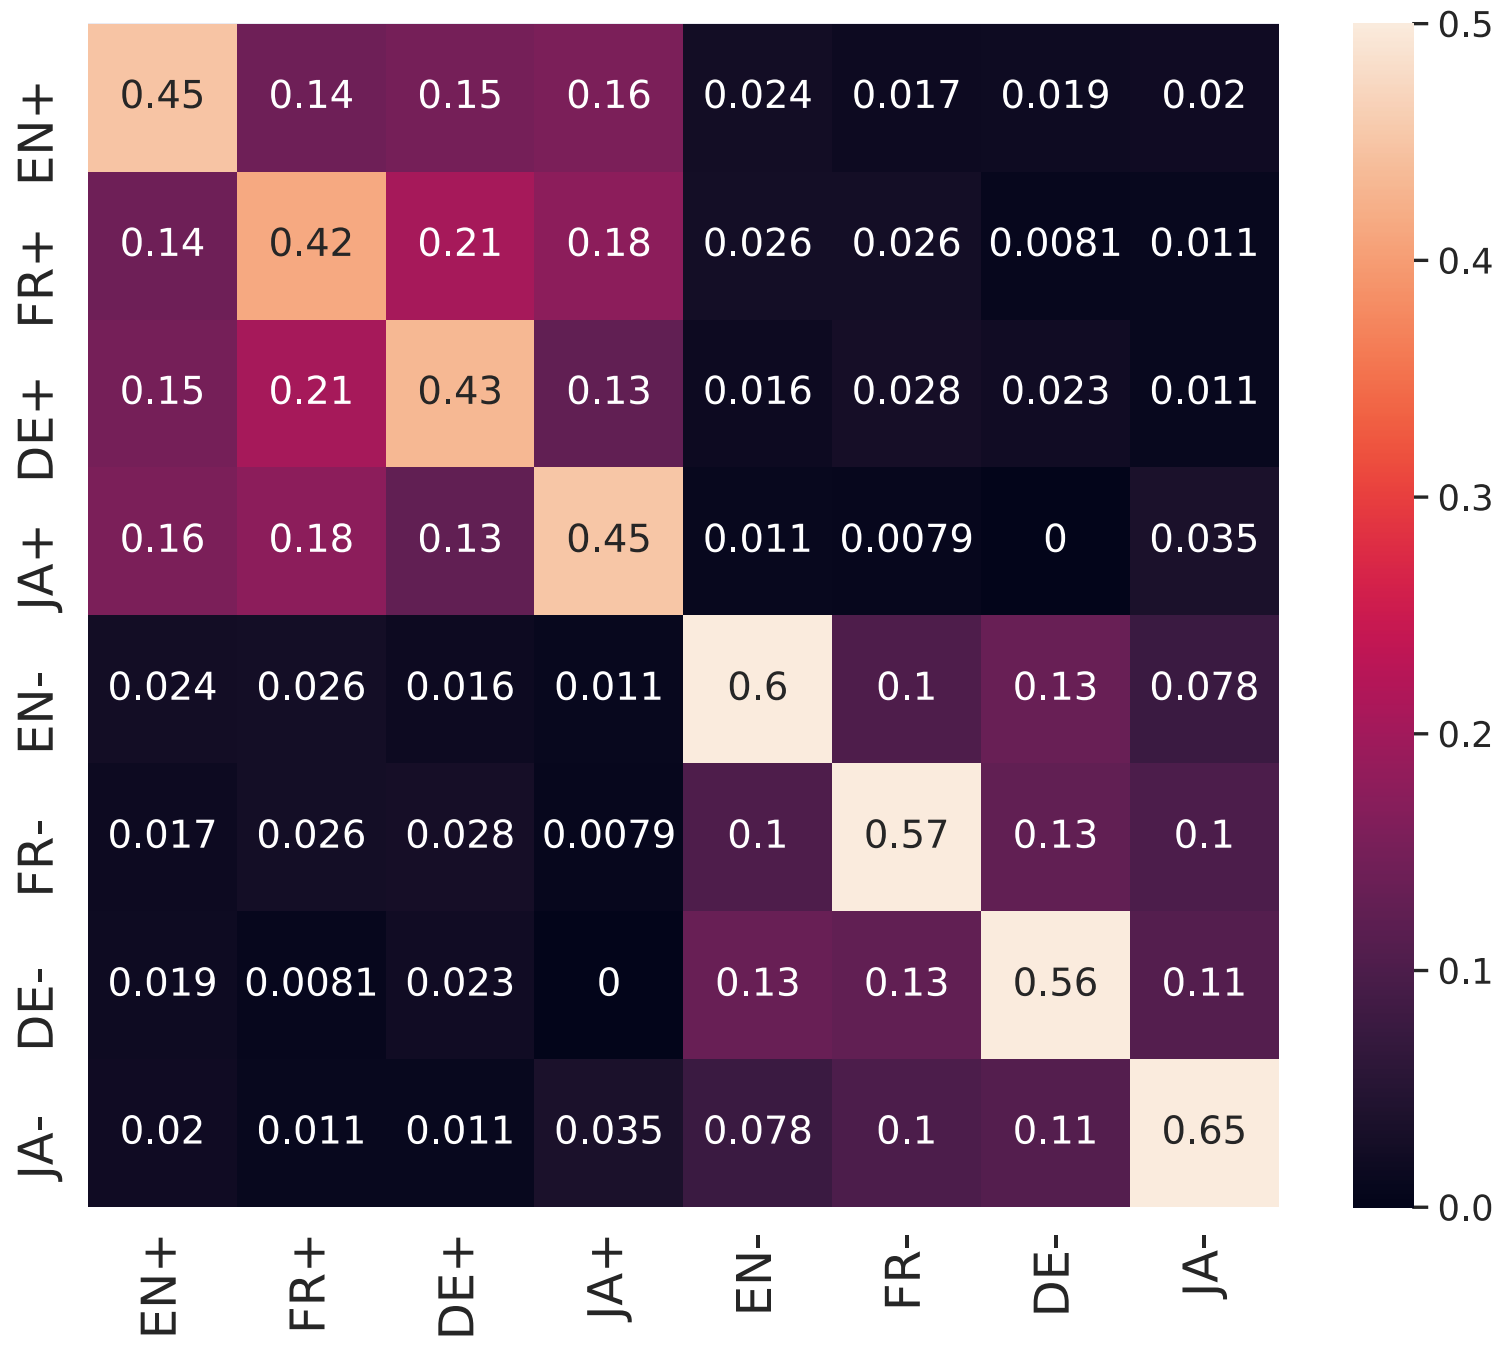

Supplement: OptionalSupplementaryMaterial [file lang2lang-ja-music-K=2.pdf › camera_ready-supply/figs/deep_number/lang2lang-ja-music-K=2.pdf]

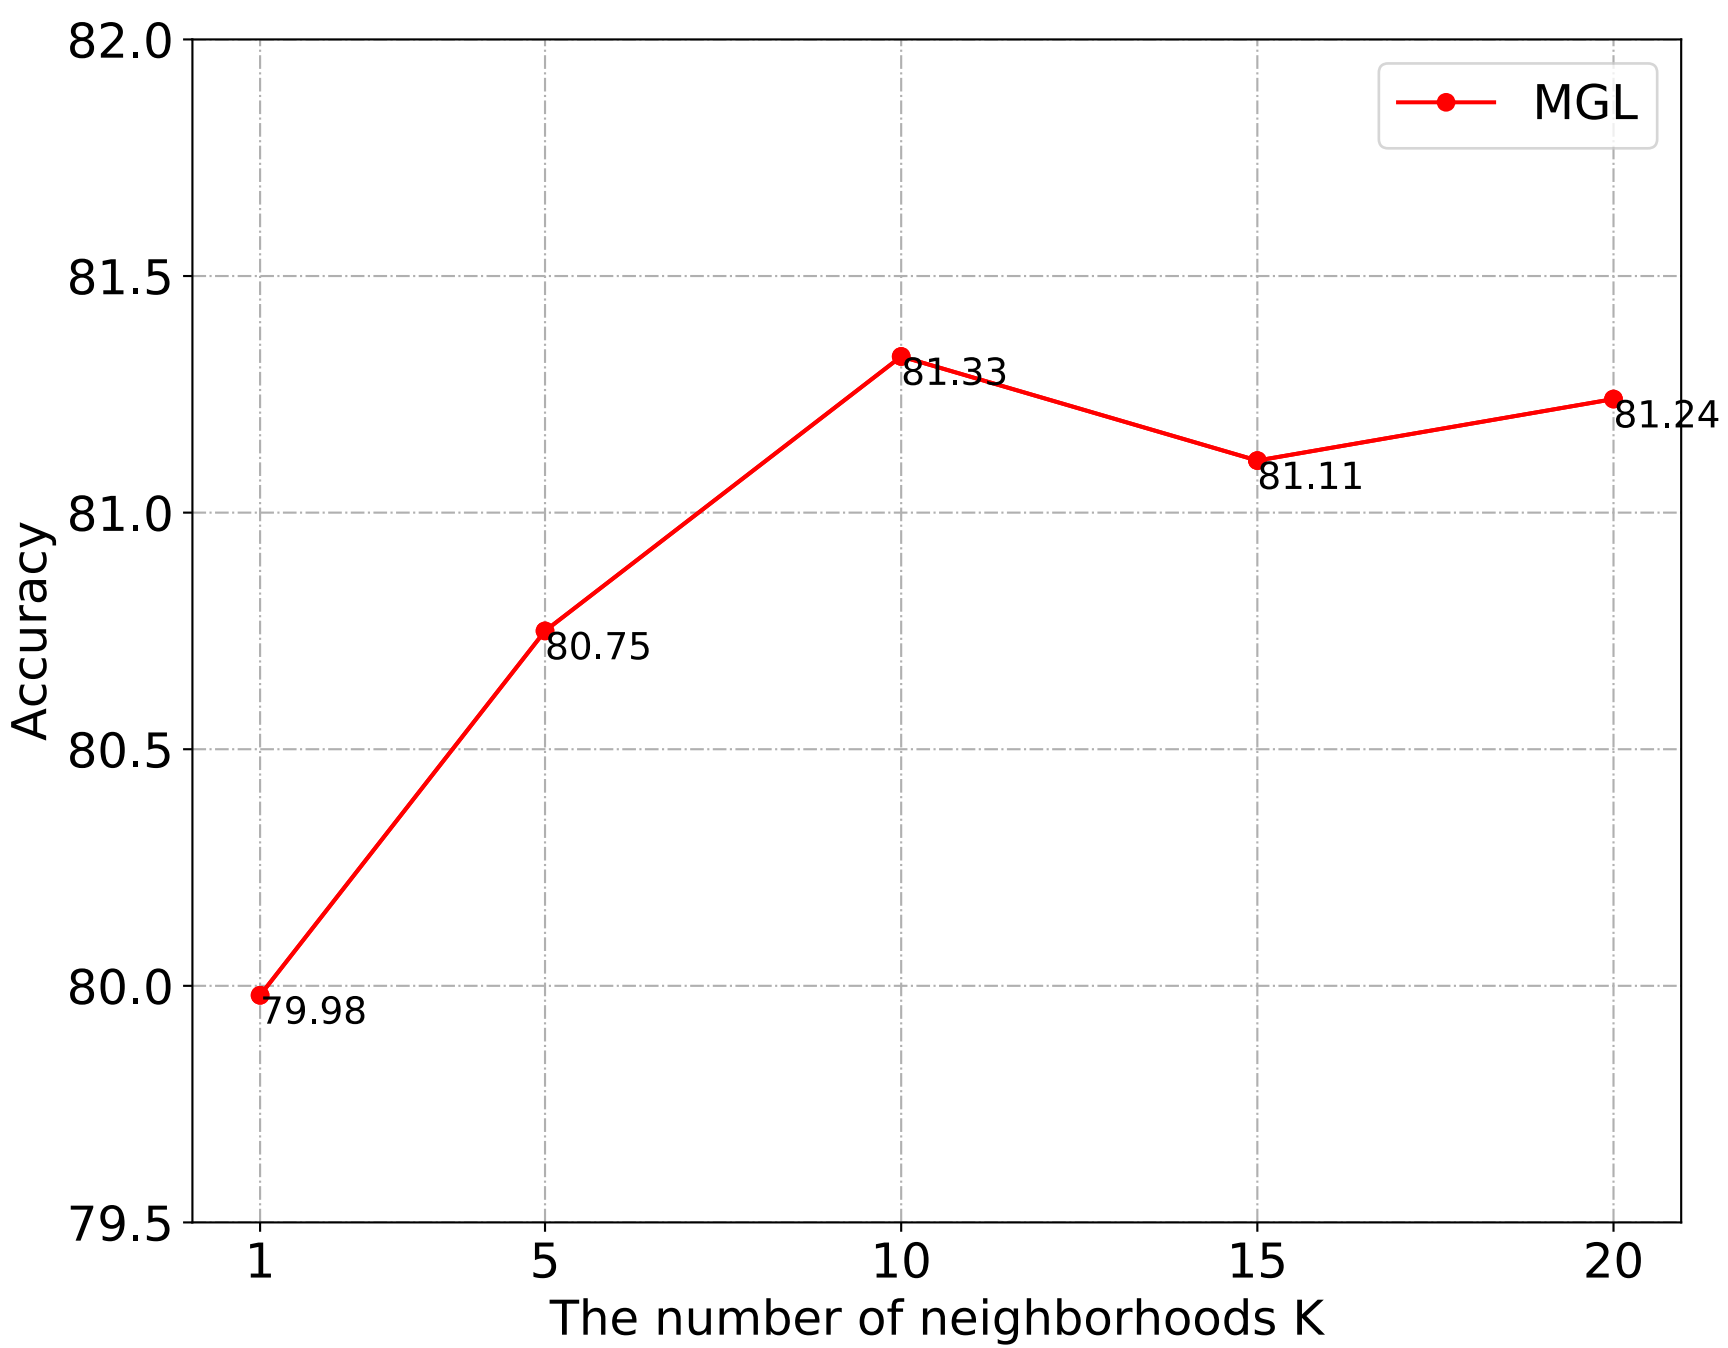

Supplement: OptionalSupplementaryMaterial [file neighborhoods.pdf › camera_ready-supply/figs/neighborhoods.pdf]

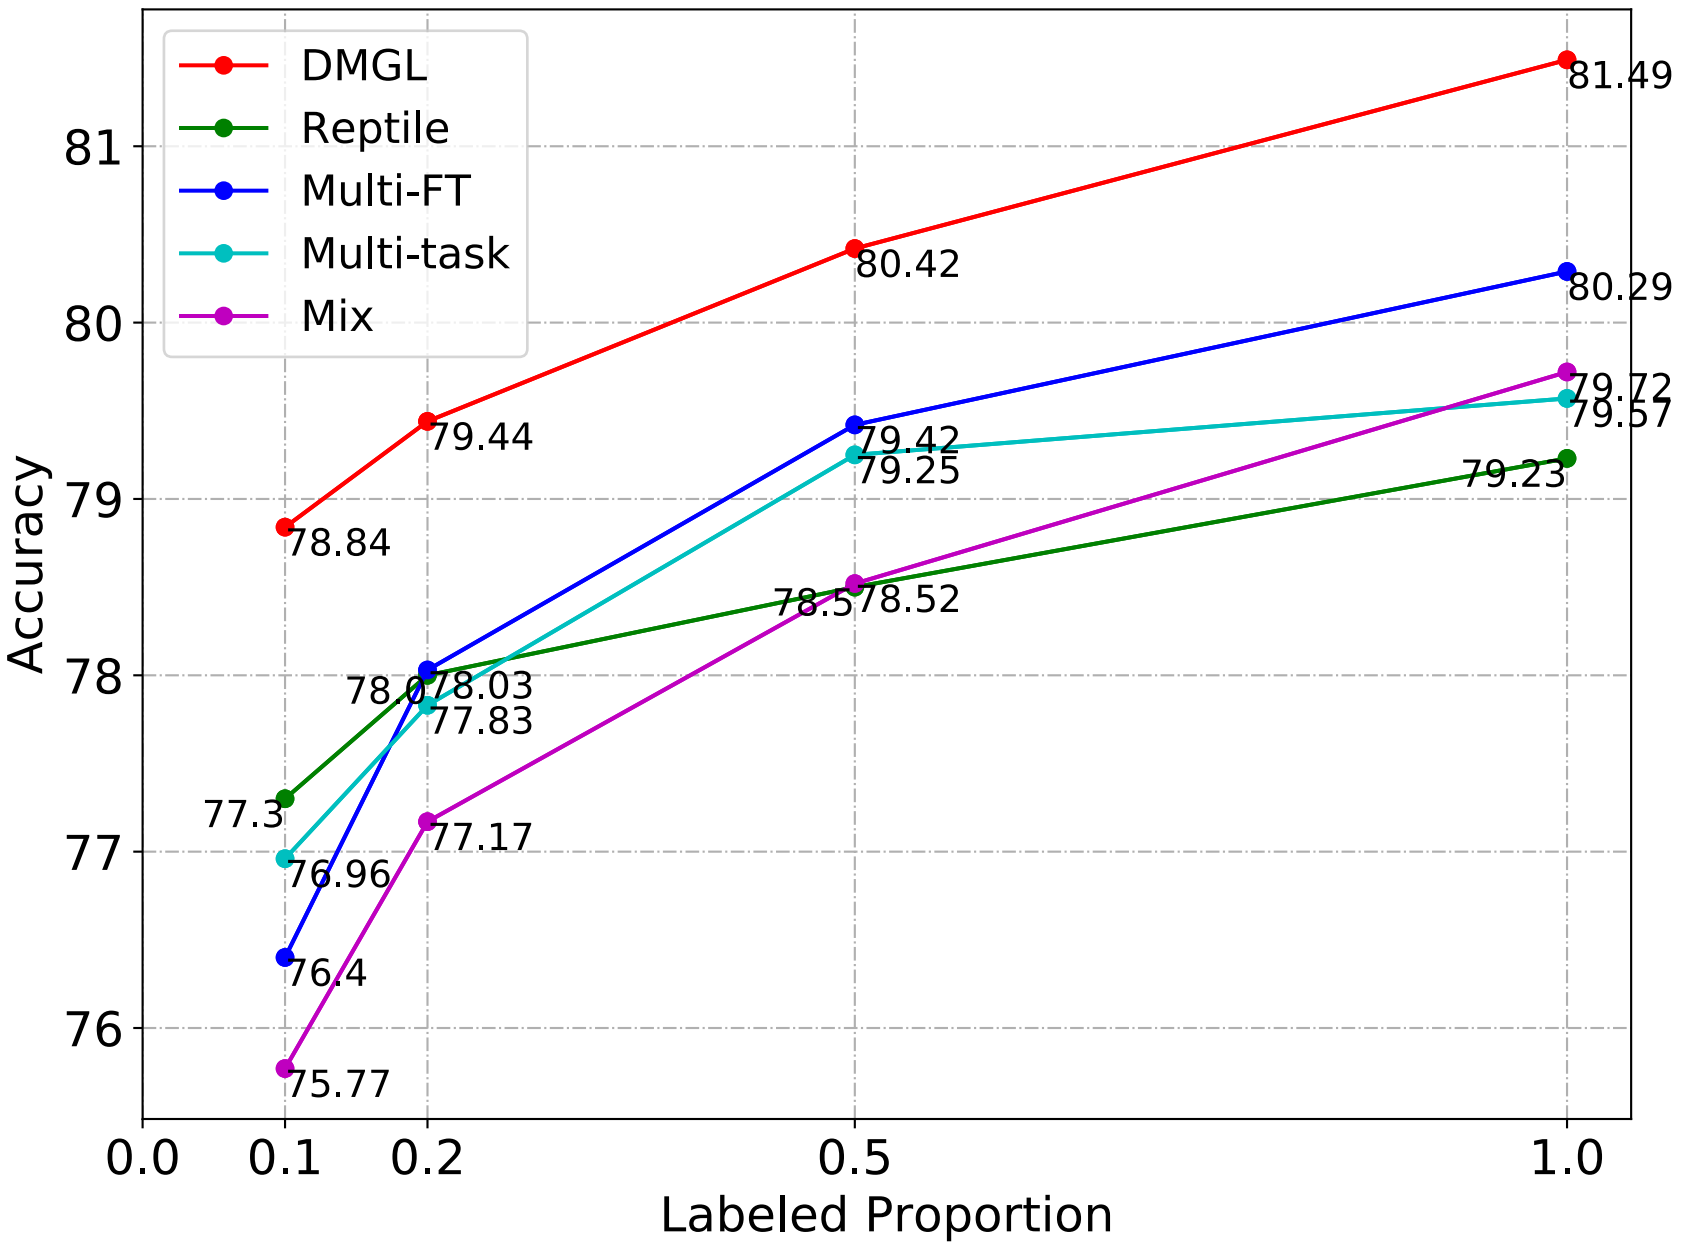

Supplement: OptionalSupplementaryMaterial [file train_prop.pdf › camera_ready-supply/figs/train_prop.pdf]
